# Supplementary material for: Kinder erleben das Krankenhaus : Deprivation und Trennungstrauma im Lichte neuerer psychologischer Forschung
Source: Springer Nature journal article supplement (doi:10.1007/s40744-022-00444-x), 1992-01-01
Supplement: MOESM1 [file 24440092]

**Collagen Turnover Biomarkers Associate with Active Psoriatic Arthritis and Decrease with Guselkumab Treatment in a Phase 3 Clinical Trial (DISCOVER-2)**

Georg Schett, PhD<sup>1</sup>, Matthew J. Loza, PhD<sup>2</sup>, Arumugam Palanichamy, PhD<sup>2</sup>, Oliver FitzGerald MD<sup>3</sup>, Christopher Ritchlin, MD, MPH<sup>4</sup>, Anne-Christine Bay-Jensen, PhD<sup>5</sup>; Signe Holm Nielsen, PhD<sup>5</sup>; Sheng Gao, PhD<sup>2</sup>, Elizabeth C. Hsia, MD, MSCE<sup>2,6</sup>, Alexa P. Kollmeier, MD<sup>7</sup>, Xie L. Xu, PhD<sup>7</sup>, Frédéric Baribaud, PhD<sup>2</sup>, Kristen Sweet, PhD<sup>2</sup>

<sup>1</sup>Friedrich Alexander University Erlangen-Nuremberg and Universitätsklinikum Erlangen, Erlangen, Germany; <sup>2</sup>Janssen Research & Development LLC, Spring House, Pennsylvania, USA; <sup>3</sup>University College Dublin, School of Medicine, Conway Institute for Biomolecular Research, Dublin 4, Ireland; <sup>4</sup>University of Rochester, Medical Center, Rochester, New York, USA; <sup>5</sup>Nordic Bioscience, Herlev, Denmark; <sup>6</sup>University of Pennsylvania School of Medicine, Philadelphia, Pennsylvania, USA; <sup>7</sup>Janssen Research & Development, LLC, San Diego, California, USA

**Corresponding author:**

Georg Schett  
Email: [georg.schett@uk-erlangen.de](mailto:georg.schett@uk-erlangen.de)

# Supplementary Figure 1. Collagen Degradation and Formation Biomarkers in the Serum of PsA Patients Compared to Healthy Controls

Healthy controls (N=76) were demographically matched (age and sex) to PsA biomarker subset (N=260). Values are median (plus [+] marks represent mean). Boxes represent interquartile range, while whiskers represent the minimum and maximum values. adj, adjusted; PsA, psoriatic arthritis; adj p<0.05

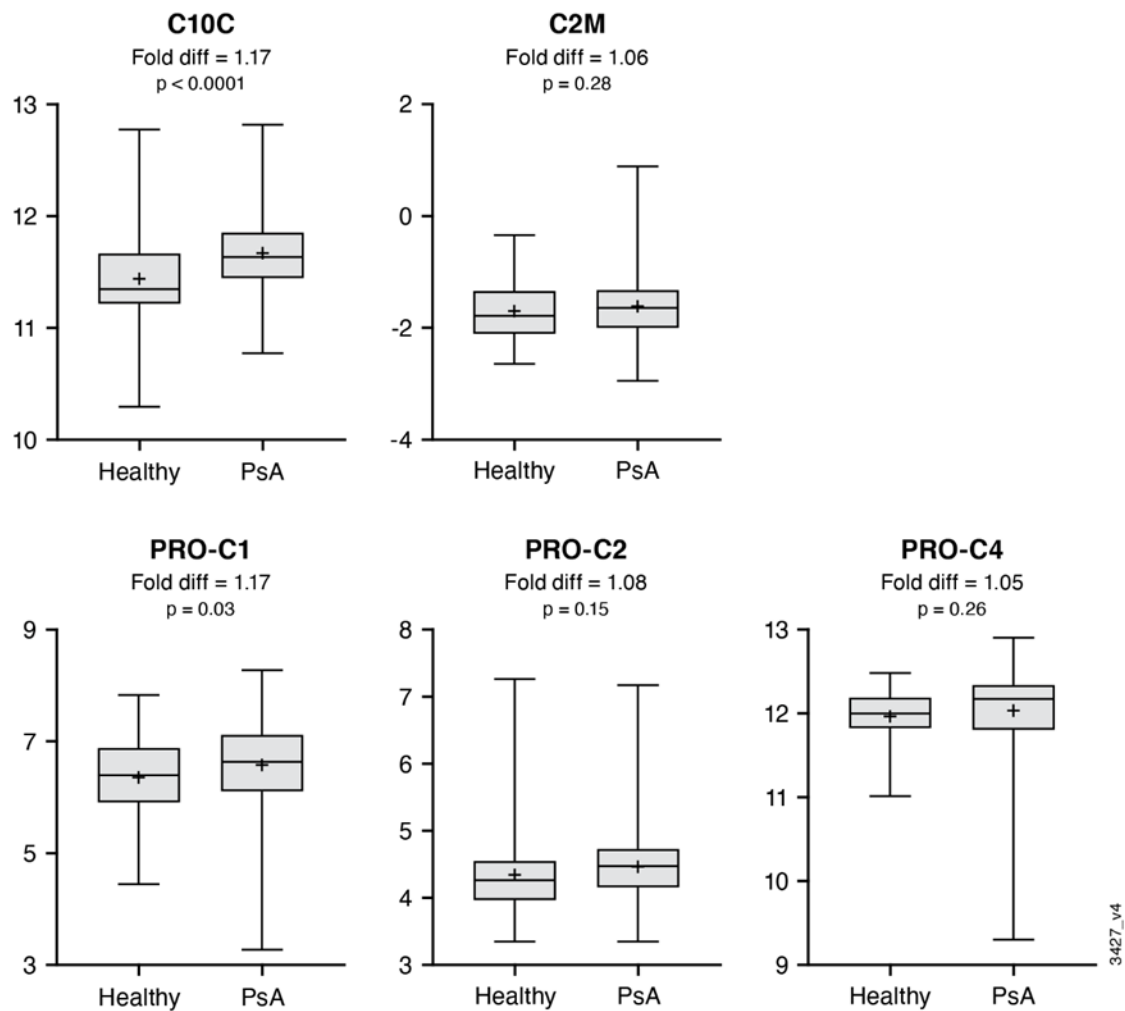

**Supplementary Table 1. Mean Biomarker Concentrations at Baseline in the Guselkumab and Placebo Groups and Healthy Subjects**

|                    | <b>Guselkumab</b>              |           | <b>Guselkumab</b>              |           | <b>Placebo</b>                 |           | <b>Healthy</b>                 |             |
|--------------------|--------------------------------|-----------|--------------------------------|-----------|--------------------------------|-----------|--------------------------------|-------------|
|                    | <b>100 mg Q4W</b>              |           | <b>100 mg Q8W</b>              |           |                                |           |                                |             |
| <b>Patients, N</b> | 82                             |           | 92                             |           | 86                             |           | 76                             |             |
| <b>Biomarker</b>   | <b>Log<sub>2</sub> (ng/mL)</b> | <b>SD</b>   |
| C1M                | 6.50                           | 0.83      | 6.27                           | 0.87      | 6.48                           | 1.05      | <b>4.73</b>                    | <b>0.29</b> |
| C2M                | -1.66                          | 0.67      | -1.54                          | 0.64      | -1.64                          | 0.56      | <b>-1.70</b>                   | <b>0.52</b> |
| C3M                | 4.04                           | 0.40      | 3.96                           | 0.39      | 4.06                           | 0.43      | <b>3.30</b>                    | <b>0.44</b> |
| C4M                | 5.43                           | 0.44      | 5.36                           | 0.47      | 5.40                           | 0.56      | <b>4.83</b>                    | <b>0.37</b> |
| C6M                | 4.92                           | 0.54      | 4.89                           | 0.55      | 5.02                           | 0.55      | <b>3.46</b>                    | <b>0.67</b> |
| C10C               | 11.66                          | 0.28      | 11.70                          | 0.33      | 11.65                          | 0.37      | <b>11.44</b>                   | <b>0.39</b> |
| PRO-C1             | 6.52                           | 0.89      | 6.66                           | 0.70      | 6.54                           | 0.73      | <b>6.36</b>                    | <b>0.73</b> |
| PRO-C2             | 4.47                           | 0.53      | 4.47                           | 0.46      | 4.45                           | 0.55      | <b>4.35</b>                    | <b>0.77</b> |
| PRO-C3             | 3.58                           | 0.50      | 3.60                           | 0.49      | 3.45                           | 0.54      | <b>3.03</b>                    | <b>0.44</b> |
| PRO-C4             | 12.02                          | 0.59      | 12.04                          | 0.42      | 12.05                          | 0.37      | <b>11.97</b>                   | <b>0.31</b> |
| PRO-C6             | 3.24                           | 0.53      | 3.29                           | 0.50      | 3.18                           | 0.48      | <b>2.77</b>                    | <b>0.47</b> |

Q4W, every 4 weeks; Q8W, every 8 weeks; SD, standard deviation

**Supplementary Table 2. Efficacy results at Week 24 for patients in the DISCOVER-2 Biomarker Subset and the overall DISCOVER-2 study population.**

| Response at<br>Week 24 | DISCOVER-2 Biomarker Subset |            |            | DISCOVER-2 Study Cohort |                 |                |
|------------------------|-----------------------------|------------|------------|-------------------------|-----------------|----------------|
|                        | Guselkumab 100 mg           |            | Placebo    | Guselkumab 100 mg       |                 | Placebo        |
|                        | Q4W                         | Q8W        |            | Q4W                     | Q8W             |                |
| Patients, N            | 82                          | 92         | 86         | 245                     | 248             | 246            |
| ACR20                  | 55 (67.1%)                  | 54 (58.7%) | 22 (25.6%) | 156 (63.7%)             | 159 (64.1%)     | 81 (32.9%)     |
| ACR50                  | 22 (26.8%)                  | 33 (35.9%) | 6 (7.0%)   | 81 (33.1%)              | 78 (31.5%)      | 35 (14.2%)     |
| PASI75*                | 64 (78.0%)                  | 72 (78.3%) | 21 (24.4%) | 144/184 (78.3%)         | 139/176 (79.0%) | 42/183 (23.0%) |
| PASI90*                | 49 (59.8%)                  | 55 (59.8%) | 8 (9.3%)   | 112/184 (60.9%)         | 121/176 (68.8%) | 18/183 (9.8%)  |

Data reported as n (%) or n/N (%).

\*PASI responses were assessed in patients with  $\geq 3\%$  body surface area psoriatic involvement and an Investigator's Global Assessment score of  $\geq 2$  at baseline. All patients included in the Biomarker Subset met these criteria.

ACR20/50,  $\geq 20\%/ \geq 50\%$  improvement in American College of Rheumatology response criteria; PASI75/90,  $\geq 75\%/ \geq 90\%$  improvement in Psoriasis Area and Severity Index score; Q4W, every 4 weeks; Q8W, every 8 weeks

**Supplementary Table 3. Guselkumab Reduces Serum levels of C1M, C3M, C4M, and C6M Relative to Baseline Levels and Relative to Placebo**

| Biomarkers |           | Guselkumab 100 mg |                   | Placebo →         | Guselkumab 100 mg             |              |             |
|------------|-----------|-------------------|-------------------|-------------------|-------------------------------|--------------|-------------|
|            |           | Q4W               | Q8W               | Guselkumab Q4W    | Q4W                           | Q8W          |             |
| C1M        | W4 vs BL  | <b>0.01</b>       | 0.15              | 0.78              | W4: Guselkumab<br>vs placebo  | 0.34         | 0.52        |
|            | W24 vs BL | <b>&lt;0.0001</b> | <b>&lt;0.0001</b> | <b>0.02</b>       | W24: Guselkumab<br>vs placebo | <b>0.002</b> | 0.05        |
|            | W52 vs BL | <b>&lt;0.0001</b> | <b>&lt;0.0001</b> | <b>&lt;0.0001</b> |                               |              |             |
| C3M        | W4 vs BL  | 0.10              | 0.24              | 0.87              | W4: Guselkumab<br>vs placebo  | 0.49         | 0.59        |
|            | W24 vs BL | <b>&lt;0.0001</b> | <b>&lt;0.0001</b> | 0.17              | W24: Guselkumab<br>vs placebo | <b>0.01</b>  | <b>0.04</b> |
|            | W52 vs BL | <b>0.0001</b>     | <b>&lt;0.0001</b> | <b>&lt;0.0001</b> |                               |              |             |
| C4M        | W4 vs BL  | 0.10              | 0.15              | 0.88              | W4: Guselkumab<br>vs placebo  | 0.34         | 0.33        |
|            | W24 vs BL | <b>&lt;0.0001</b> | <b>&lt;0.0001</b> | 0.23              | W24: Guselkumab<br>vs placebo | <b>0.01</b>  | <b>0.01</b> |
|            | W52 vs BL | <b>&lt;0.0001</b> | <b>&lt;0.0001</b> | <b>&lt;0.0001</b> |                               |              |             |

**Supplementary Table 3. Guselkumab Reduces Serum levels of C1M, C3M, C4M, and C6M Relative to Baseline Levels and Relative to Placebo**

| Biomarkers |           | Guselkumab 100 mg |                   | Placebo →         | Guselkumab 100 mg             |      |             |
|------------|-----------|-------------------|-------------------|-------------------|-------------------------------|------|-------------|
|            |           | Q4W               | Q8W               | Guselkumab Q4W    | Q4W                           | Q8W  |             |
| C6M        | W4 vs BL  | <b>0.02</b>       | 0.15              | 0.78              | W4: Guselkumab<br>vs placebo  | 0.34 | 0.40        |
|            | W24 vs BL | <b>&lt;0.0001</b> | <b>&lt;0.0001</b> | <b>0.02</b>       | W24: Guselkumab<br>vs placebo | 0.07 | <b>0.04</b> |
|            | W52 vs BL | <b>&lt;0.0001</b> | <b>&lt;0.0001</b> | <b>&lt;0.0001</b> |                               |      |             |

GUS Q4W, N=82; GUS Q8W, N=92; placebo, N=86. Adj, adjusted; BL, baseline; Q4W, every 4 weeks; Q8W, every 8 weeks; W, week

All values were adjusted p values.

Bolded values indicate significant difference (p<0.05).
